# Supplementary material for: Evolution of Stenotrophomonas maltophilia in Cystic Fibrosis Lung over Chronic Infection: A Genomic and Phenotypic Population Study
Source: PubMed Central journal article supplement (PMC5581383; doi:10.3389/fmicb.2017.01590), 2017-08-28
Supplement: Table3.pdf [file Table3.pdf]

**Supplementary Table 3** - Presence of antibiotic resistance genes inferred by CARD database

| ARO category                                                                                                                                 | gene                                                                    |   |    |    |
|----------------------------------------------------------------------------------------------------------------------------------------------|-------------------------------------------------------------------------|---|----|----|
|                                                                                                                                              |                                                                         | 1 | 10 | 11 |
| antibiotic inactivation enzyme; determinant of aminoglycoside resistance                                                                     | <i>AAC(6')-Iz</i>                                                       | 1 | 1  | 1  |
| efflux pump complex or subunit conferring antibiotic resistance                                                                              | <i>acrB</i>                                                             | 1 | 1  | 1  |
| efflux pump complex or subunit conferring antibiotic resistance                                                                              | <i>adeA</i>                                                             | 1 | 1  | 1  |
| efflux pump complex or subunit conferring antibiotic resistance                                                                              | <i>adeB</i>                                                             | 1 | 1  | 1  |
| efflux pump complex or subunit conferring antibiotic resistance; protein(s) and two-component regulatory system modulating antibiotic efflux | <i>adeL</i>                                                             | 1 | 1  | 1  |
| antibiotic inactivation enzyme; determinant of aminoglycoside resistance                                                                     | <i>APH(3')-IIc</i>                                                      | 1 | 1  | 1  |
| antibiotic target modifying enzyme; determinant of resistance to peptide antibiotics                                                         | <i>Brucella suis mprF</i>                                               | 1 | 1  | 1  |
| antibiotic inactivation enzyme; determinant of beta-lactam resistance                                                                        | L1 beta-lactamase                                                       | 1 | 1  | 1  |
| efflux pump complex or subunit conferring antibiotic resistance                                                                              | <i>macA</i>                                                             | 1 | 1  | 1  |
| efflux pump complex or subunit conferring antibiotic resistance                                                                              | <i>macB</i>                                                             | 1 | 1  | 1  |
| efflux pump complex or subunit conferring antibiotic resistance                                                                              | <i>MexJ</i>                                                             | 1 | 1  | 1  |
| efflux pump complex or subunit conferring antibiotic resistance                                                                              | <i>MexK</i>                                                             | 1 | 1  | 1  |
| efflux pump complex or subunit conferring antibiotic resistance                                                                              | <i>MexW</i>                                                             | 1 | 1  | 1  |
| antibiotic target protection protein; determinant of fluoroquinolone resistance                                                              | <i>mfd</i>                                                              | 1 | 1  | 1  |
| efflux pump complex or subunit conferring antibiotic resistance                                                                              | <i>msbA</i>                                                             | 1 | 1  | 1  |
| efflux pump complex or subunit conferring antibiotic resistance                                                                              | <i>MuxB</i>                                                             | 1 | 1  | 1  |
| efflux pump complex or subunit conferring antibiotic resistance                                                                              | <i>MuxC</i>                                                             | 1 | 1  | 1  |
| antibiotic resistant gene variant or mutant; determinant of beta-lactam resistance                                                           | <i>Neisseria meningitidis</i> PBP2 conferring resistance to beta-lactam | 1 | 1  | 1  |
| efflux pump complex or subunit conferring antibiotic resistance                                                                              | <i>OprN</i>                                                             | 1 | 1  | 1  |
| efflux pump complex or subunit conferring antibiotic resistance                                                                              | <i>oqxA</i>                                                             | 1 | 1  | 1  |
| efflux pump complex or subunit conferring antibiotic resistance                                                                              | <i>oqxB</i>                                                             | 1 | 1  | 1  |
| determinant of polymyxin resistance; gene altering cell wall charge                                                                          | <i>PmrC</i>                                                             | 1 | 0  | 1  |
| efflux pump complex or subunit conferring antibiotic resistance                                                                              | <i>rosB</i>                                                             | 1 | 1  | 1  |
| efflux pump complex or subunit conferring antibiotic resistance                                                                              | <i>smeA</i>                                                             | 1 | 1  | 1  |
| efflux pump complex or subunit conferring antibiotic resistance                                                                              | <i>smeB</i>                                                             | 1 | 1  | 1  |
| efflux pump complex or subunit conferring antibiotic resistance                                                                              | <i>smeC</i>                                                             | 1 | 1  | 1  |
| efflux pump complex or subunit conferring antibiotic resistance                                                                              | <i>smeD</i>                                                             | 1 | 1  | 1  |
| efflux pump complex or subunit conferring antibiotic resistance                                                                              | <i>smeE</i>                                                             | 1 | 1  | 1  |
| efflux pump complex or subunit conferring antibiotic resistance                                                                              | <i>smeF</i>                                                             | 1 | 1  | 1  |
| efflux pump complex or subunit conferring antibiotic resistance; protein(s) and two-component regulatory system modulating antibiotic efflux | <i>smeR</i>                                                             | 1 | 1  | 1  |
| efflux pump complex or subunit conferring antibiotic resistance; protein(s) and two-component regulatory system modulating antibiotic efflux | <i>smeS</i>                                                             | 1 | 1  | 1  |
| efflux pump complex or subunit conferring antibiotic resistance                                                                              | <i>mdtB</i>                                                             | 0 | 0  | 0  |

|                                                                                                                       |                                  |   |   |   |
|-----------------------------------------------------------------------------------------------------------------------|----------------------------------|---|---|---|
| efflux pump complex or subunit conferring antibiotic resistance                                                       | <i>mdtC</i>                      | 0 | 0 | 0 |
| efflux pump complex or subunit conferring antibiotic resistance                                                       | <i>MuxA</i>                      | 0 | 0 | 0 |
| determinant of polymyxin resistance; gene altering cell wall charge                                                   | <i>PmrE</i>                      | 0 | 0 | 0 |
| efflux pump complex or subunit conferring antibiotic resistance                                                       | <i>acrD</i>                      | 0 | 0 | 0 |
| antibiotic inactivation enzyme; determinant of aminoglycoside resistance                                              | <i>ANT(2'')-Ia</i>               | 0 | 0 | 0 |
| antibiotic target replacement protein; determinant of sulfonamide resistance                                          | <i>sulI</i>                      | 0 | 0 | 0 |
| antibiotic inactivation enzyme; determinant of aminoglycoside resistance                                              | <i>AAC(6')-3I</i>                | 0 | 0 | 0 |
| antibiotic resistant gene variant or mutant; determinant of isoniazid resistance; determinant of triclosan resistance | antibiotic resistant <i>fabI</i> | 0 | 0 | 0 |
| efflux pump complex or subunit conferring antibiotic resistance                                                       | <i>mexM</i>                      | 0 | 0 | 0 |
| efflux pump complex or subunit conferring antibiotic resistance                                                       | <i>mexN</i>                      | 0 | 0 | 0 |
| efflux pump complex or subunit conferring antibiotic resistance                                                       | <i>floR</i>                      | 0 | 0 | 0 |
| efflux pump complex or subunit conferring antibiotic resistance                                                       | <i>qacH</i>                      | 0 | 0 | 0 |
| antibiotic inactivation enzyme; determinant of aminoglycoside resistance                                              | <i>AAC(3)-IIa</i>                | 0 | 0 | 0 |
| efflux pump complex or subunit conferring antibiotic resistance                                                       | <i>tet(G)</i>                    | 0 | 0 | 0 |

---







|   |   |   |   |   |   |   |   |   |   |   |   |   |   |   |   |   |   |   |   |   |   |   |   |   |   |   |   |   |
|---|---|---|---|---|---|---|---|---|---|---|---|---|---|---|---|---|---|---|---|---|---|---|---|---|---|---|---|---|
| 0 | 0 | 0 | 0 | 0 | 0 | 0 | 0 | 0 | 0 | 0 | 0 | 0 | 0 | 0 | 0 | 0 | 0 | 0 | 0 | 0 | 1 | 0 | 0 | 0 | 0 | 0 | 0 | 0 |
| 1 | 1 | 1 | 1 | 1 | 1 | 1 | 1 | 1 | 1 | 0 | 0 | 0 | 0 | 0 | 0 | 0 | 0 | 0 | 0 | 0 | 1 | 0 | 0 | 0 | 0 | 0 | 0 | 0 |
| 0 | 0 | 0 | 0 | 0 | 0 | 0 | 0 | 0 | 0 | 0 | 0 | 0 | 0 | 0 | 0 | 0 | 0 | 0 | 0 | 0 | 0 | 0 | 0 | 0 | 0 | 0 | 0 | 0 |
| 0 | 0 | 0 | 0 | 0 | 0 | 0 | 0 | 0 | 0 | 0 | 0 | 0 | 0 | 0 | 0 | 0 | 0 | 0 | 0 | 0 | 0 | 0 | 0 | 0 | 0 | 0 | 0 | 0 |
| 0 | 0 | 0 | 0 | 0 | 0 | 0 | 0 | 0 | 0 | 0 | 0 | 0 | 0 | 0 | 0 | 0 | 0 | 0 | 0 | 0 | 0 | 0 | 0 | 0 | 0 | 0 | 0 | 0 |
| 0 | 0 | 0 | 0 | 0 | 0 | 0 | 0 | 0 | 0 | 0 | 0 | 0 | 0 | 0 | 0 | 0 | 0 | 0 | 0 | 0 | 0 | 0 | 0 | 0 | 0 | 0 | 0 | 0 |
| 0 | 0 | 0 | 0 | 0 | 0 | 0 | 0 | 0 | 0 | 0 | 0 | 0 | 0 | 0 | 0 | 0 | 0 | 0 | 0 | 0 | 0 | 0 | 0 | 0 | 0 | 0 | 0 | 0 |
| 0 | 0 | 0 | 0 | 0 | 0 | 0 | 0 | 0 | 0 | 0 | 0 | 0 | 0 | 0 | 0 | 0 | 0 | 0 | 0 | 0 | 0 | 0 | 0 | 0 | 0 | 0 | 0 | 0 |
| 1 | 1 | 1 | 1 | 1 | 1 | 1 | 1 | 1 | 1 | 0 | 0 | 0 | 0 | 0 | 0 | 0 | 0 | 0 | 0 | 0 | 0 | 0 | 0 | 0 | 0 | 0 | 0 | 0 |
| 1 | 1 | 1 | 1 | 1 | 1 | 1 | 1 | 1 | 1 | 0 | 0 | 0 | 0 | 0 | 0 | 0 | 0 | 0 | 0 | 0 | 0 | 0 | 0 | 0 | 0 | 0 | 0 | 0 |
| 0 | 0 | 0 | 0 | 0 | 0 | 0 | 0 | 0 | 0 | 0 | 0 | 0 | 1 | 1 | 1 | 1 | 0 | 1 | 1 | 0 | 0 | 0 | 0 | 0 | 0 | 0 | 0 | 0 |
| 0 | 0 | 0 | 0 | 0 | 0 | 0 | 0 | 0 | 0 | 0 | 0 | 0 | 0 | 0 | 0 | 0 | 1 | 0 | 0 | 0 | 0 | 0 | 0 | 0 | 0 | 0 | 0 | 0 |
| 0 | 0 | 0 | 0 | 0 | 0 | 0 | 0 | 0 | 0 | 0 | 0 | 0 | 0 | 0 | 0 | 0 | 0 | 0 | 0 | 0 | 1 | 0 | 0 | 0 | 0 | 0 | 0 | 0 |
| 0 | 0 | 0 | 0 | 0 | 0 | 0 | 0 | 0 | 0 | 0 | 0 | 0 | 0 | 0 | 0 | 0 | 0 | 0 | 0 | 0 | 1 | 0 | 0 | 0 | 0 | 0 | 0 | 0 |

---
