# Supplementary material for: Evolution of Stenotrophomonas maltophilia in Cystic Fibrosis Lung over Chronic Infection: A Genomic and Phenotypic Population Study
Source: PubMed Central journal article supplement (PMC5581383; doi:10.3389/fmicb.2017.01590), 2017-08-28
Supplement: Table5.pdf [file Table5.pdf]

**Supplementary Table 5.** Biofilm formation by *S. maltophilia* strains belonging to selected STs over 12-year period from 10 CF patients.

| ST <sup>a</sup> (n) | No. (%) of strains belonging to the following biofilm producer classes <sup>b</sup> : |          |          |          | <i>p</i> -value (Fisher's exact test): |                                                                                       |
|---------------------|---------------------------------------------------------------------------------------|----------|----------|----------|----------------------------------------|---------------------------------------------------------------------------------------|
|                     | Non-producer                                                                          | Weak     | Moderate | Strong   | within ST                              | vs other STs                                                                          |
| 5 (20)              | 1 (5)                                                                                 | 3 (15)   | 9 (45)   | 7 (35)   | 0.004 (M vs NP)<br>0.048 (M vs W)      | 0.012 (S, vs 1007)                                                                    |
| 91 (11)             | 6 (54.5)                                                                              | 1 (9.1)  | 2 (18.2) | 2 (18.2) | NS <sup>c</sup>                        | NS                                                                                    |
| 179 (7)             | 0                                                                                     | 2 (28.6) | 1 (14.3) | 4 (57.1) | NS                                     | 0.004 (S, vs 1007)<br>0.025 (S, vs 1008)                                              |
| 184 (15)            | 9 (60)                                                                                | 2 (13.3) | 4 (26.6) | 0        | <0.001 (NP vs S)<br>0.020 (NP vs W)    | 0.007 (NP, vs 1008)<br>0.016 (NP, vs 1002)<br><0.001 (NP, vs 5)<br>0.025 (W, vs 1007) |
| 185 (8)             | 0                                                                                     | 5 (62.5) | 3 (37.5) | 0        | 0.025 (W vs NP)                        | 0.040 (W, vs 91)<br>0.022 (W, vs 5)                                                   |

<sup>a</sup> ST, sequence type.

<sup>b</sup> Biofilm biomass values were interpreted according to the following biofilm producer classes (see reference 3, supplementary materials and methods): OD ≤ OD<sub>c</sub> = non producer (NP); OD<sub>c</sub> < OD ≤ 2xOD<sub>c</sub> = weak producer (W); 2xOD<sub>c</sub> < OD ≤ 4xOD<sub>c</sub> = moderate producer (M); OD > 4xOD<sub>c</sub> = strong producer (S), where OD<sub>c</sub> is OD<sub>492</sub> of control (not inoculated) wells.

<sup>c</sup> NS, not significant.
