# Supplementary material for: Evolution of Stenotrophomonas maltophilia in Cystic Fibrosis Lung over Chronic Infection: A Genomic and Phenotypic Population Study
Source: PubMed Central journal article supplement (PMC5581383; doi:10.3389/fmicb.2017.01590), 2017-08-28
Supplement: Table8.pdf [file Table8.pdf]

**Supplementary Table 8.** *In vitro* susceptibility of *S. maltophilia* strains, isolated from 10 CF patients over 12-year period, belonging to selected STs. MIC values were stratified on ST and interpreted according to CLSI-suggested breakpoints. Drug abbreviations: TZP, piperacillin-tazobactam; LVX, levofloxacin; AMK, amikacin; SXT, trimethoprim-sulfamethoxazole; MIN, minocycline; TIM, ticarcillin-clavulanic acid; CHL, chloramphenicol; CIP, ciprofloxacin; CAZ, ceftazidime; DOX, doxycycline.

| ST <sup>b</sup> (n) | No. (%) of strains resistant <sup>a</sup> to: |           |                     |        |       |                      |                    |           |           |         |
|---------------------|-----------------------------------------------|-----------|---------------------|--------|-------|----------------------|--------------------|-----------|-----------|---------|
|                     | TZP                                           | LVX       | AMK                 | SXT    | MIN   | TIM                  | CHL                | CIP       | CAZ       | DOX     |
| <b>5 (20)</b>       | 16 (80)                                       | 9 (45)    | 16 (80)             | 5 (25) | 0 (0) | 11 (55) <sup>§</sup> | 11 (55)            | 18 (90)   | 16 (80)   | 1 (0.5) |
| <b>91 (10)</b>      | 7 (70)                                        | 4 (40)    | 2 (20) <sup>°</sup> | 0 (0)  | 0 (0) | 6 (60)               | 3 (30)             | 8 (80)    | 8 (80)    | 0 (0)   |
| <b>179 (7)</b>      | 7 (100)                                       | 6 (85.7)* | 7 (100)             | 0 (0)  | 0 (0) | 7 (100)              | 0 (0) <sup>^</sup> | 7 (100)   | 7 (100)   | 0 (0)   |
| <b>184 (15)</b>     | 15 (100)                                      | 4 (26.6)  | 14 (93.3)           | 0 (0)  | 0 (0) | 14 (93.3)            | 8 (53.3)           | 14 (93.3) | 14 (93.3) | 1 (0.5) |
| <b>185 (8)</b>      | 8 (100)                                       | 0 (0)     | 8 (100)             | 0 (0)  | 0 (0) | 8 (100)              | 6 (75)             | 7 (87.5)  | 8 (100)   | 0 (0)   |

<sup>a</sup> Strains showing "intermediate susceptibility" were considered as "resistant".

<sup>b</sup> ST, sequence type.

\* LVX: ST179 vs ST184 and ST185;  $p < 0.05$ , chi-square test.

<sup>^</sup> CHL: ST179 vs ST5, ST184, and ST185;  $p < 0.05$ , chi-square test.

<sup>°</sup> AMK: ST91 vs other STs;  $p < 0.01$ , chi-square test.

<sup>§</sup> TIM: ST5 vs ST179, ST184 and ST185;  $p < 0.05$ , chi-square test.
